# Supplementary material
Source: Springer Nature journal article supplement (https://www.springermedizin.de/resource/supplementary/12889_2014_7256_MOESM1_ESM.pdf/9497142)

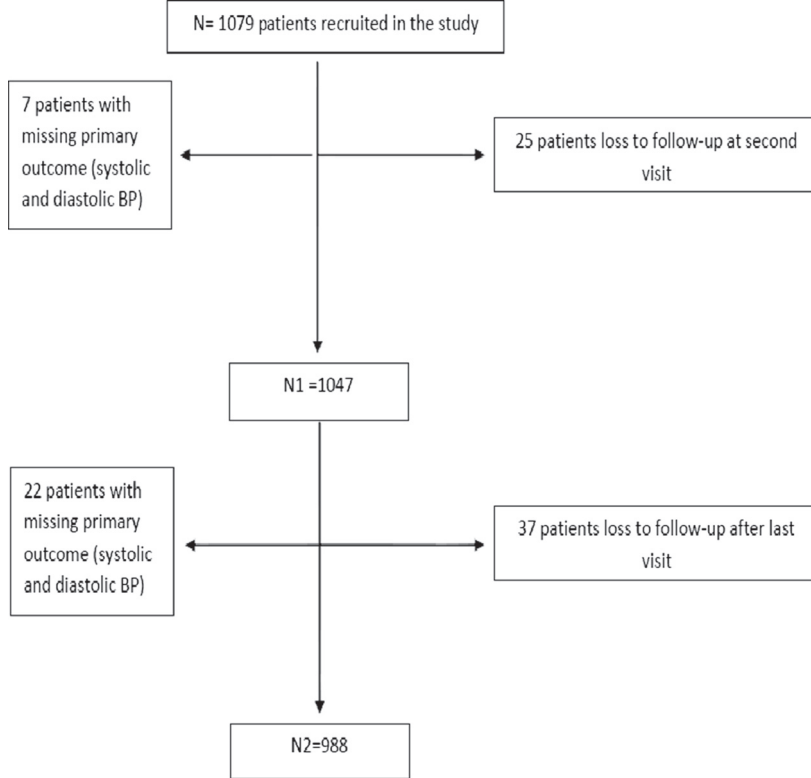

N1: eligible patients who completed visit at month 1

N2: eligible patients for analysis

Supplement: MOESM1 [file 9497142]
